# Supplementary material
Source: publisher figshare collection journal article supplement (https://diabetesjournals.figshare.com/articles/dataset/_/28746314)
Supplement: Supplementary file 1 [file 1]

# 5 Why's

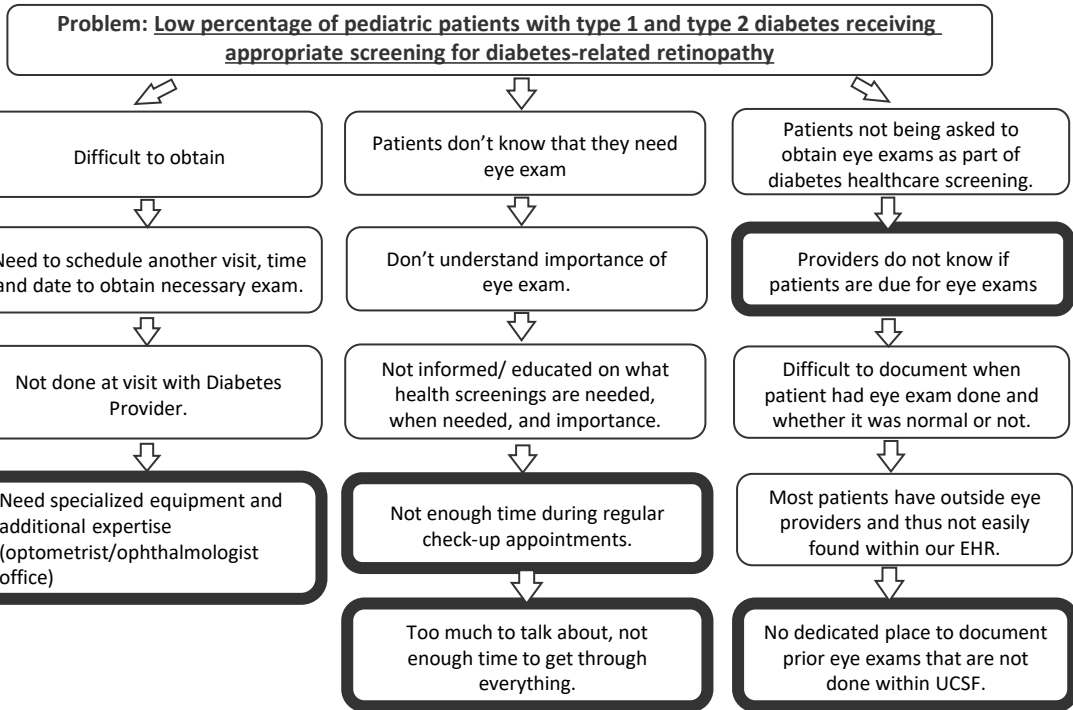

Supplementary Figure S1. Five Why's Diagram. Abbreviations: EHR – electronic health record, UCSF – University of California, San Francisco.
