# Supplementary material
Source: publisher figshare collection journal article supplement (https://diabetesjournals.figshare.com/articles/dataset/_/28746314)
Supplement: Supplementary file 2 [file 1]

Supplementary Table S1. Barriers, root causes and countermeasures. Status of completion for each countermeasure at the end of June 2023 listed to the right on the table.

Abbreviations: DR – diabetes-related retinopathy, HCP – health care practitioner, UCSF – University of California, San Francisco.

| Barrier                                                     | Root Cause                                                                                                                                                                                                             | Countermeasures<br>(Experiments/Tactics)                                                                    | Status      |
|-------------------------------------------------------------|------------------------------------------------------------------------------------------------------------------------------------------------------------------------------------------------------------------------|-------------------------------------------------------------------------------------------------------------|-------------|
| Access to eye-care specialist                               | <ul style="list-style-type: none"> <li>Could not perform in diabetes clinic due to need for specialized equipment and additional expertise</li> </ul>                                                                  | Obtain retinal camera and train staff (Medical Assistants)                                                  | Completed   |
|                                                             |                                                                                                                                                                                                                        | Partner with UCSF Pediatric Ophthalmology to read retinal images                                            | Completed   |
| Lack of education about importance of retinopathy screening | <ul style="list-style-type: none"> <li>Not enough time to talk about DR during clinic visit</li> <li>Patients/HCP may not know the importance of DR screening</li> <li>HCPs do not know how to place orders</li> </ul> | Create educational materials (2020): paper brochure & electronic smart-phrase for After Visit Summary (AVS) | Completed   |
|                                                             |                                                                                                                                                                                                                        | Update educational materials and improve awareness of resources                                             | In progress |
|                                                             |                                                                                                                                                                                                                        | Educational session to diabetes HCPs by a pediatric ophthalmologist                                         | Completed   |
|                                                             |                                                                                                                                                                                                                        | Create “How To” written and video instructions for HCPs                                                     | Completed   |
|                                                             |                                                                                                                                                                                                                        | Include button in EHR to order retinal photography in Best Practice Alert (BPA)                             | Completed   |
|                                                             |                                                                                                                                                                                                                        |                                                                                                             |             |
| Lack of centralized documentation for HCPs                  | <ul style="list-style-type: none"> <li>HCPs 1) do not know when eye exams are due, 2) do not have a dedicated place to document pertinent details</li> </ul>                                                           | Encourage HCPs to use centralized documentation (type of diabetes, date of diagnosis, date of last exam)    | In progress |
|                                                             |                                                                                                                                                                                                                        | Email subset of HCPs with eligible patients, followed by weekly reminders                                   | Completed   |
|                                                             |                                                                                                                                                                                                                        | Survey to HCPs to assess barriers and needs to improve                                                      | Completed   |

|  |  |                                                                                |           |
|--|--|--------------------------------------------------------------------------------|-----------|
|  |  | DR screening for eligible patients                                             |           |
|  |  | Improve Best Practice Alert (BPA) – firing appropriately, added order for exam | Completed |
