# Supplementary material
Source: publisher figshare collection journal article supplement (https://diabetesjournals.figshare.com/articles/dataset/_/28746314)
Supplement: Supplementary file 3 [file 1]

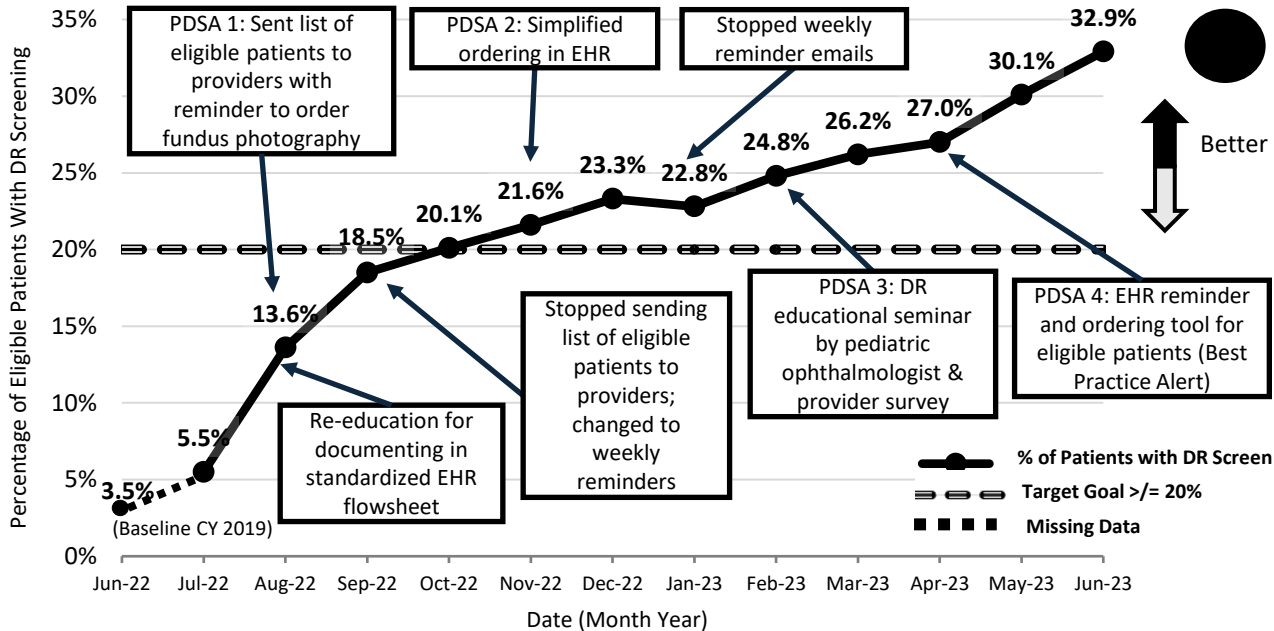

Supplementary Figure S3. Annotated line graph showing the percentage of eligible patients with type 1 diabetes and type 2 diabetes who completed diabetes-related retinopathy (DR) screens from June 2022 to July 2023. The rate of retinal screening is defined as a percentage of those who received a retinal exam in the past 24 months out of all patients who were eligible for an eye exam seen in the diabetes clinic in the past 12 months from the date of data query. Abbreviations: DR – diabetes-related retinopathy, EHR – electronic health record.
