# Supplementary material
Source: publisher figshare collection journal article supplement (https://diabetesjournals.figshare.com/articles/dataset/_/28746314)
Supplement: Supplementary file 4 [file 1]

Process Map for Retinal Screening Workflow

Legend:

○

 Beginning or end points

◇

 Decision point

□

 Process

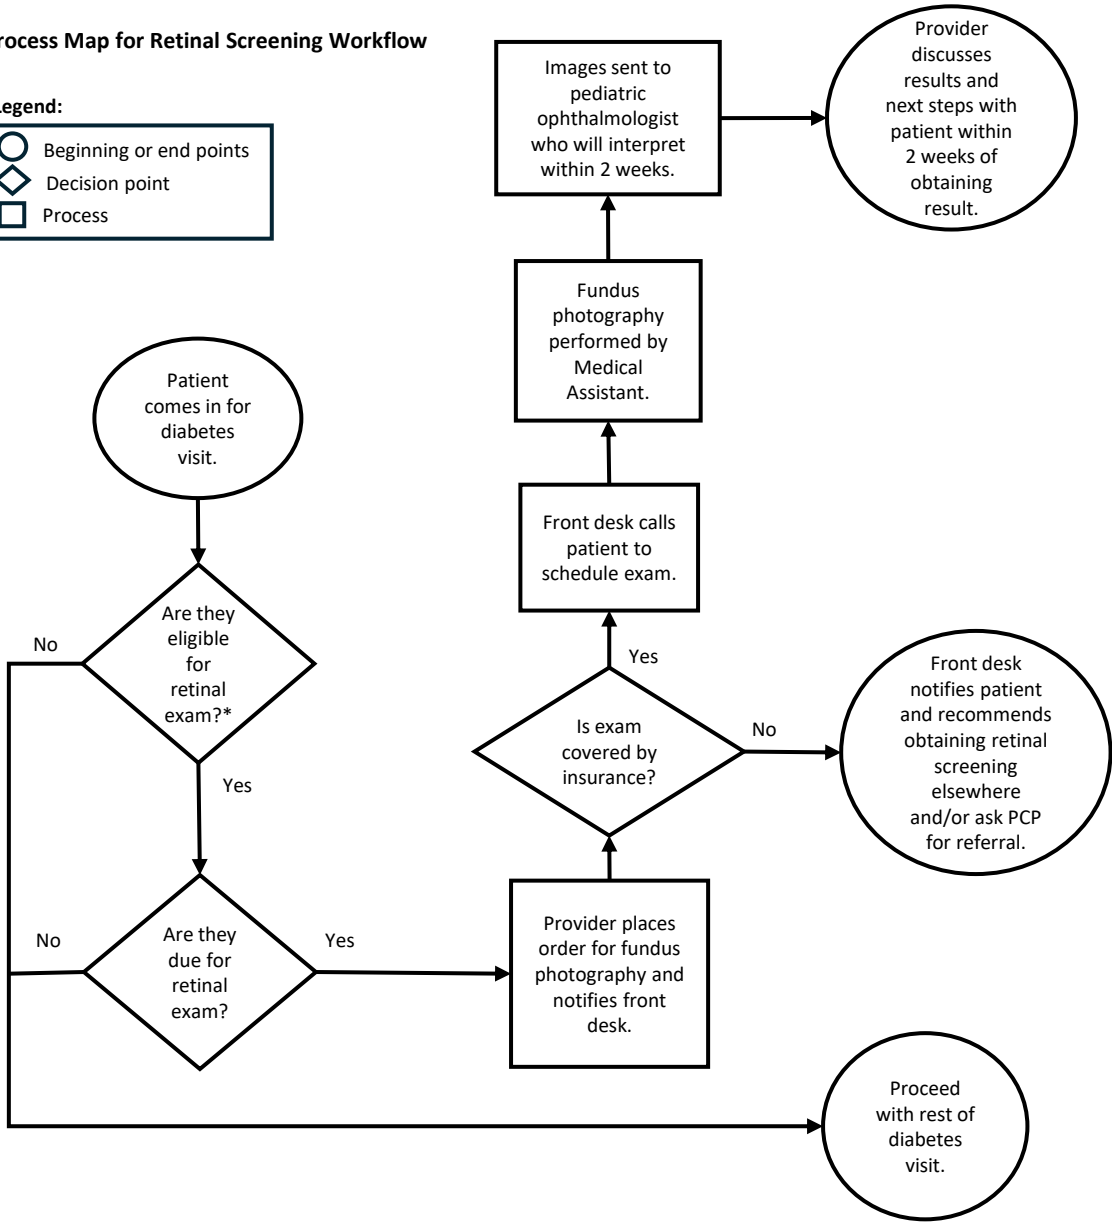

Supplementary Figure S2. Process Map for In-Clinic Retinal Screening Workflow.  
Abbreviations: PCP – primary care provider. \* based on most recent ADA Standards of Care Guidelines
